# Supplementary material for: Early increased neutrophil-to-lymphocyte ratio is associated with poor 3-month outcomes in spontaneous intracerebral hemorrhage
Source: PLoS One. 2019 Feb 7;14(2):e0211833. doi: 10.1371/journal.pone.0211833 (PMC6366889; doi:10.1371/journal.pone.0211833)
Supplement: S2 Table — (DOCX) [file pone.0211833.s002.docx]

| **S2 Table.** Univariate logistic regression analyses of functional independence (FI, mRS 0–2) at 3 months after discharge   | Variables | OR (95% CI) | *p* | | --- | --- | --- | | Age | 0.98 (0.94, 1.02) | 0.299 | | Male sex | 1.94 (1.00, 3.76) | 0.051a | | Premorbid mRS | 0.00 (0.00, 0.00) | 0.999 | | Time from onset to sampling, h | 1.01 (0.94, 1.09) | 0.767 | | Coronary heart disease | 0.42 (0.12, 1.61) | 0.205 | | Hypertension | 1.28 (0.65, 2.50) | 0.477 | | Diabetes mellitus | 1.05 (0.36, 3.03) | 0.930 | | Hyperlipemia | 0.56 (0.30, 1.06) | 0.075a | | History of stroke | 0.55 (0.26, 1.16) | 0.115 | | Intensive care unit (ICU) | 0.05 (0.02, 0.11) | <0.001a | | Endotracheal intubation | 0.05 (0.22, 0.10) | <0.001a | | Nasogastric feeding tube | 0.04 (0.01, 0.13) | 0.001a | | Catheter | 0.00 (0.00, 0.00) | 0.997 | | Operation | 0.19 (0.10, 0.37) | <0.001a | | Infection | 0.06 (0.02, 0.17) | <0.001a | | Duration of hospitalization, d | | | | ≤7 | | <0.001a | | 7–14 | 0.18 (0.08, 0.39) | <0.001a | | >14 | 0.69 (0.31, 1.55) | 0.364 | | Infratentorial | 0.66 (0.27, 1.65) | 0.375 | | Intraventricular hemorrhage, IVH | 0.39 (0.20, 0.78) | 0.008a | | Larger ICH volume (>30 cm³) | 0.07 (0.04, 0.15) | <0.001a | | NIHSS admission score | 0.77 (0.72, 0.83) | <0.001a | | Glasgow coma scale | 1.40 (1.28, 1.54) | <0.001a | | White cell counts, 1000/mm³ | 0.86 (0.80, 0.92) | <0.001a | | Neutrophil counts, 1000/mm³ | 0.85 (0.80, 0.92) | <0.001a | | Lymphocyte counts, 1000/mm³ | 1.28 (0.85, 1.93) | 0.246 | | Lymphopenia on admission | 0.75(0.40, 1.40) | 0.364 | | NLR0 | 0.94 (0.91, 0.97) | <0.001a | | Monocyte counts, 1000/mm³ | 0.55 (0.19, 1.63) | 0.280 | |
| --- | --- | --- | --- | --- | --- | --- | --- | --- | --- | --- | --- | --- | --- | --- | --- | --- | --- | --- | --- | --- | --- | --- | --- | --- | --- | --- | --- | --- | --- | --- | --- | --- | --- | --- | --- | --- | --- | --- | --- | --- | --- | --- | --- | --- | --- | --- | --- | --- | --- | --- | --- | --- | --- | --- | --- | --- | --- | --- | --- | --- | --- | --- | --- | --- | --- | --- | --- | --- | --- | --- | --- | --- | --- | --- | --- | --- | --- | --- | --- | --- | --- | --- | --- | --- | --- | --- | --- | --- | --- | --- | --- | --- | --- |

ICH, intracerebral hemorrhage; mRS, modified Rankin scale; NLR, neutrophil-to-lymphocyte ratio

a*p* < 0.1 were the candidate confounders for multivariate logistic regression analysis
